# Supplementary material for: Size-dependent penetration of carbon dots inside the ferritin nanocages: evidence for the quantum confinement effect in carbon dots
Source: Royal Society of Chemistry journal article supplement (doi:10.1039/c5cp00543d), 2015-01-01
Supplement: c5cp00543d1.pdf [file c5cp00543d1.pdf]

## Supplementary Information

### **Size-dependent penetration of carbon dots inside the ferritin nanocages: evidence for quantum confinement effect in carbon dots**

**Arpan Bhattacharya, Surajit Chatterjee, Roopali Prajapati, and Tushar Kanti Mukherjee\***

Discipline of Chemistry, Indian Institute of Technology Indore, M-Block, IET-DAVV Campus,  
Khandwa Road, Indore-452017, M.P., India.

\* Corresponding author. E-mail: [tusharm@iiti.ac.in](mailto:tusharm@iiti.ac.in); Tel: +91-7312438738.

**Figure S1.** PL decay curves ( $\lambda_{\text{ex}}= 376 \text{ nm}$ ) of CDs in the absence and presence of  $2.02 \mu\text{M}$  ferritin recorded at  $455 \text{ nm}$ .

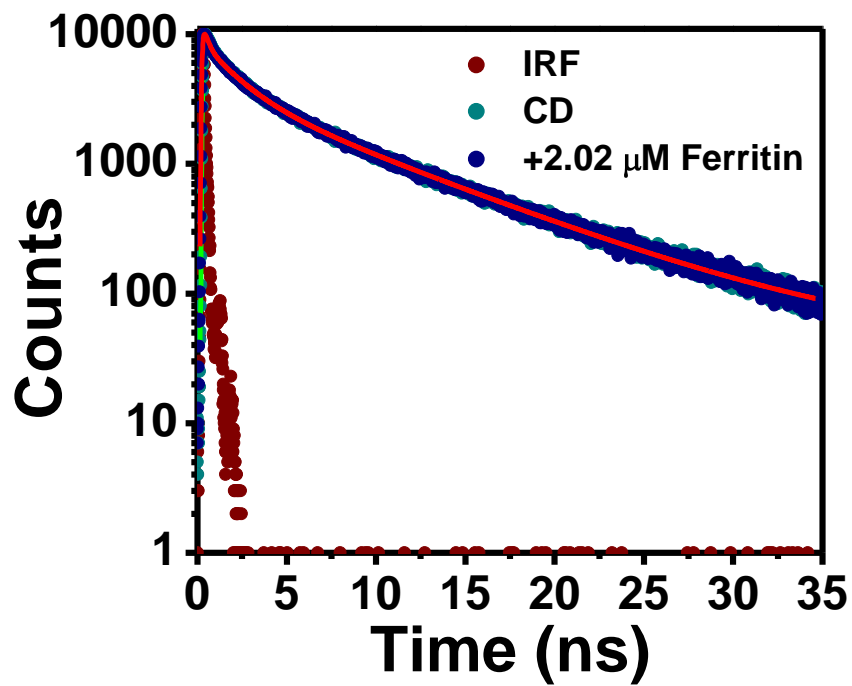

**Figure S2.** The far-UV CD spectra of ferritin (0.8  $\mu\text{M}$ ) in absence and presence of CDs (0.01 mg/mL).

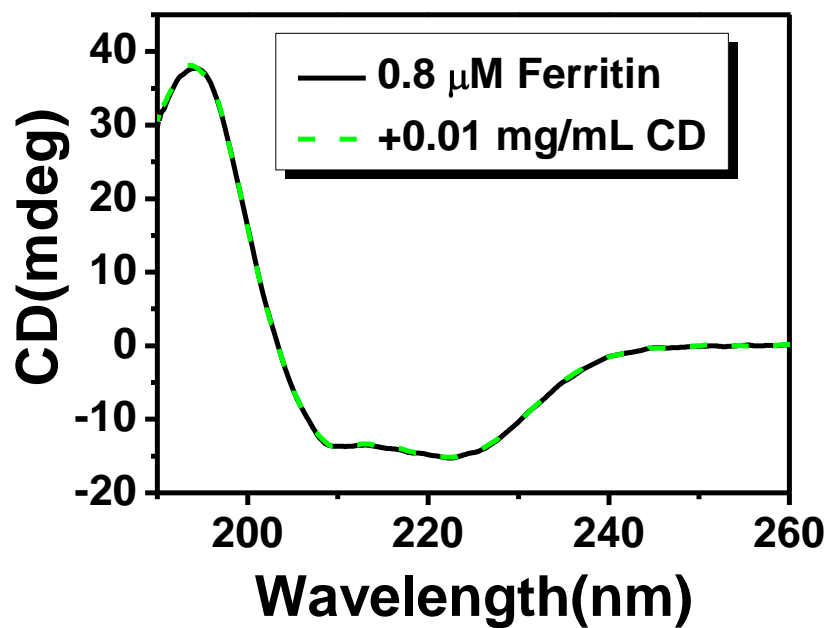

**Table S1.** PL lifetime decay ( $\lambda_{\text{ex}} = 376$  nm) analysis of CDs in the absence and presence of different concentrations of ferritin at an emission wavelength of 455 nm.

| Sample                        | $\tau_1(\text{ns})$ | $a_1$ | $\tau_2(\text{ns})$ | $a_2$ | $\tau_3(\text{ns})$ | $a_3$ | $\langle\tau\rangle$ (ns) | $\chi^2$ |
|-------------------------------|---------------------|-------|---------------------|-------|---------------------|-------|---------------------------|----------|
| CD (0.01 mg/mL)               | 3.90                | 0.31  | 10.62               | 0.29  | 0.934               | 0.40  | 4.66                      | 1.03     |
| + 0.2 $\mu\text{M}$ Ferritin  | 3.89                | 0.30  | 10.59               | 0.29  | 0.931               | 0.41  | 4.62                      | 1.05     |
| + 2.02 $\mu\text{M}$ Ferritin | 3.86                | 0.29  | 10.56               | 0.29  | 0.928               | 0.42  | 4.57                      | 1.06     |

**Table S2.** PL lifetime decay ( $\lambda_{\text{ex}}= 376$  nm) analysis of CDs in the absence and presence of different concentrations of aqueous  $\text{Fe}^{3+}$  ions at an emission wavelength of 455 nm.

| Sample                               | $\tau_1$ (ns) | $a_1$ | $\tau_2$ (ns) | $a_2$ | $\tau_3$ (ns) | $a_3$ | $\langle\tau\rangle$ (ns) | $\chi^2$ |
|--------------------------------------|---------------|-------|---------------|-------|---------------|-------|---------------------------|----------|
| CD                                   | 3.90          | 0.31  | 10.62         | 0.30  | 0.934         | 0.40  | 4.66                      | 1.00     |
| + 100 $\mu\text{M}$ $\text{Fe}^{3+}$ | 2.88          | 0.34  | 10.16         | 0.31  | 0.621         | 0.35  | 4.33                      | 1.06     |
| + 200 $\mu\text{M}$ $\text{Fe}^{3+}$ | 2.42          | 0.31  | 9.63          | 0.31  | 0.402         | 0.38  | 3.89                      | 1.07     |
| +300 $\mu\text{M}$ $\text{Fe}^{3+}$  | 2.40          | 0.32  | 9.54          | 0.28  | 0.383         | 0.40  | 3.59                      | 1.06     |
| +400 $\mu\text{M}$ $\text{Fe}^{3+}$  | 2.17          | 0.31  | 9.42          | 0.26  | 0.291         | 0.43  | 3.25                      | 1.07     |
| +500 $\mu\text{M}$ $\text{Fe}^{3+}$  | 2.15          | 0.26  | 9.38          | 0.24  | 0.252         | 0.50  | 2.94                      | 1.09     |
